# Supplementary material
Source: Research Square preprint supplement (doi:10.21203/rs.3.rs-9555652/v1)
Supplement: Supplementary file 1 [file 354dcef46619a759505968ac.docx]

**Appendices**

Appendix I: Age-group Morphometric Comparison

Table A-I: One-way ANOVA/Kruskal-Wallis Results

| Parameters | Test Used | Statistics | p-value | Interpretation |
| --- | --- | --- | --- | --- |
| Height | ANOVA | F = 2.35 | 0.079 | Not significant |
| Width | ANOVA | F = 2.76 | 0.047 | Significant |
| Depth | Kruskal-Wallis | H = 9.8 | 0.002 | Significant |
| Volume | ANOVA | F = 4.82 | 0.0003 | Significant |
